# Supplementary material for: Age-related changes in the physical properties, cross-linking, and glycation of collagen from mouse tail tendon
Source: PubMed Central journal article supplement (PMC7397091; doi:10.1074/jbc.ra119.011031), 2020-05-07
Supplement: supp_RA119.011031_155781_4_supp_524005_q9ss7z.pdf [file supp_RA119.011031_155781_4_supp_524005_q9ss7z.pdf]

Supplementary figures follow:

Figure S1

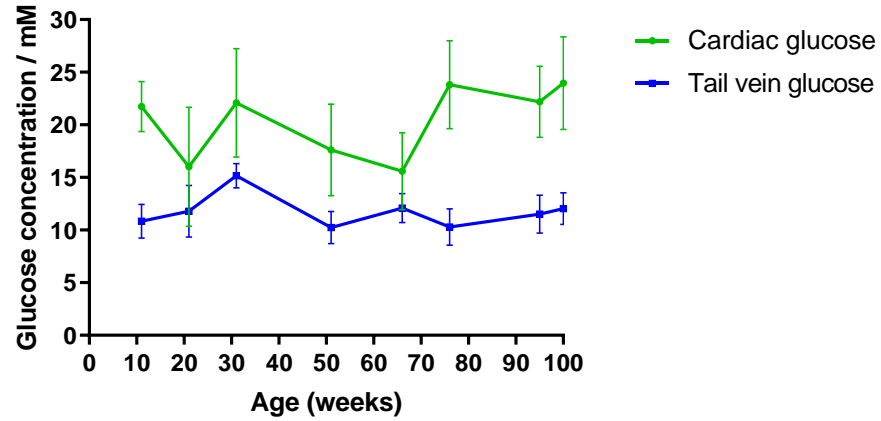

Figure S1a Graphs showing the measured glucose levels in C57Bl/6 mice (mean  $\pm$ SD) after fasting for 6 hours in different age groups (n=5-12) immediately after culling.

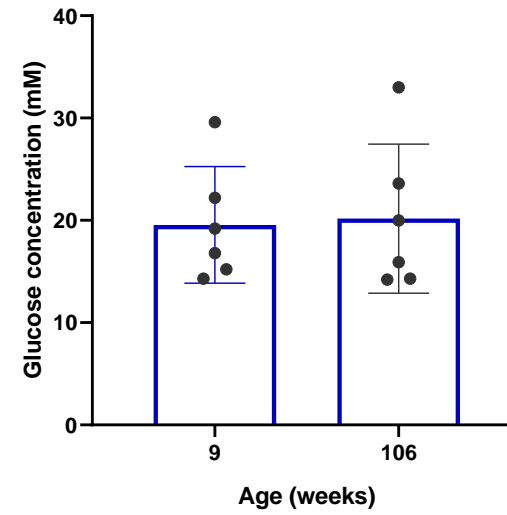

Figure S1b Graphs showing the measured cardiac glucose levels in non-fasting C57Bl/6 mice in different age groups (n=6) immediately after culling (mean  $\pm$ SD).

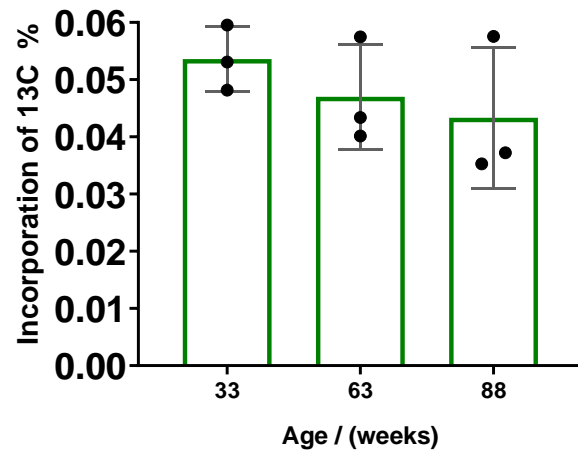

Figure S1c The incorporation of  $^{13}\text{C}_6$  Lysine into tendon fibres per day (mean  $\pm$ SD). Mice were fed  $^{13}\text{C}_6$  Lysine for 28 days (n=3).

Figure S2

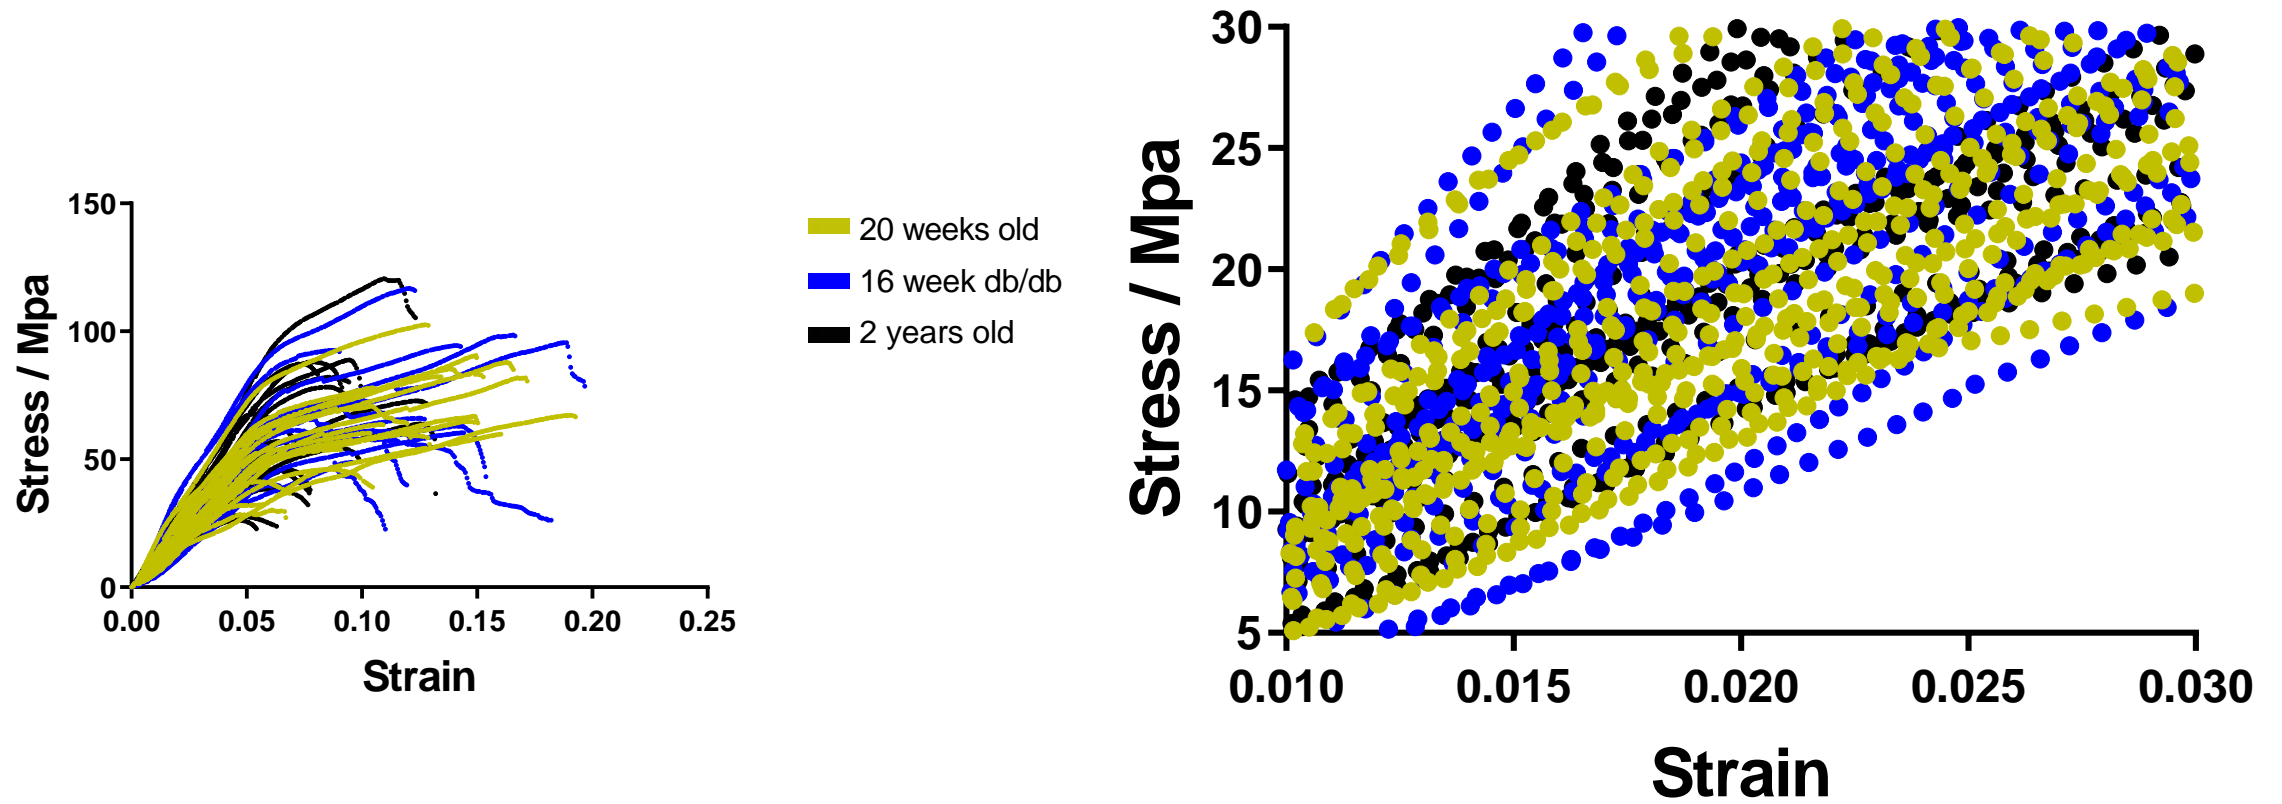

Figure S5 Overlay of traces in figure 2 and 4a (main text) and expansion. The steeper lines to the left show increased stiffness.

Figure S3

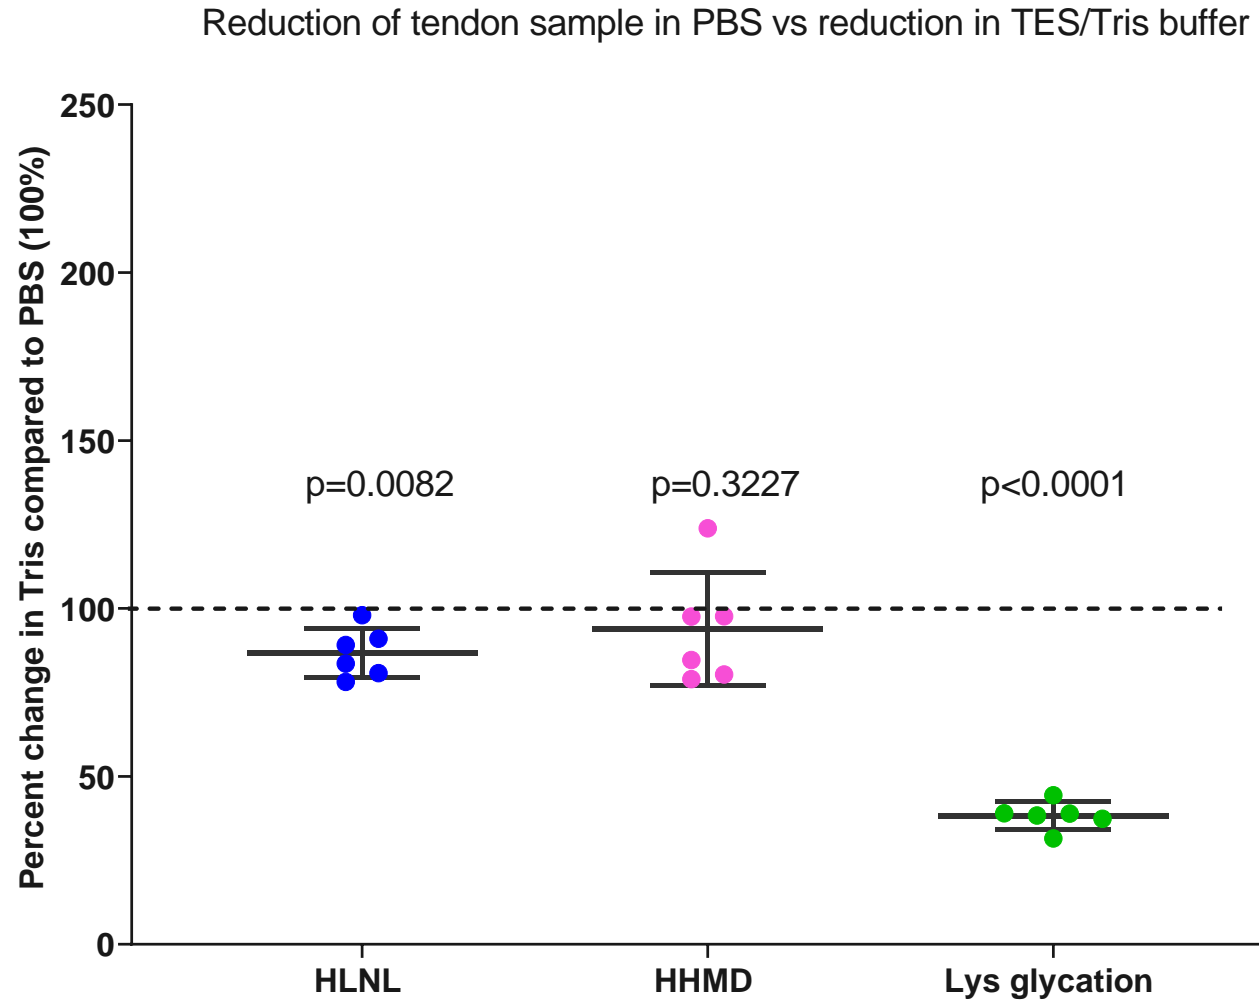

Figure S4

Fragmentation of NaBH<sub>4</sub> reduced HHMD signal

**S1 11wk tendon daughters Frg CV55**

MS\_JC\_093\_10 312 (9.424) Cm (307:327-419:452)

2: Daughters of 574ES+  
6.34e4

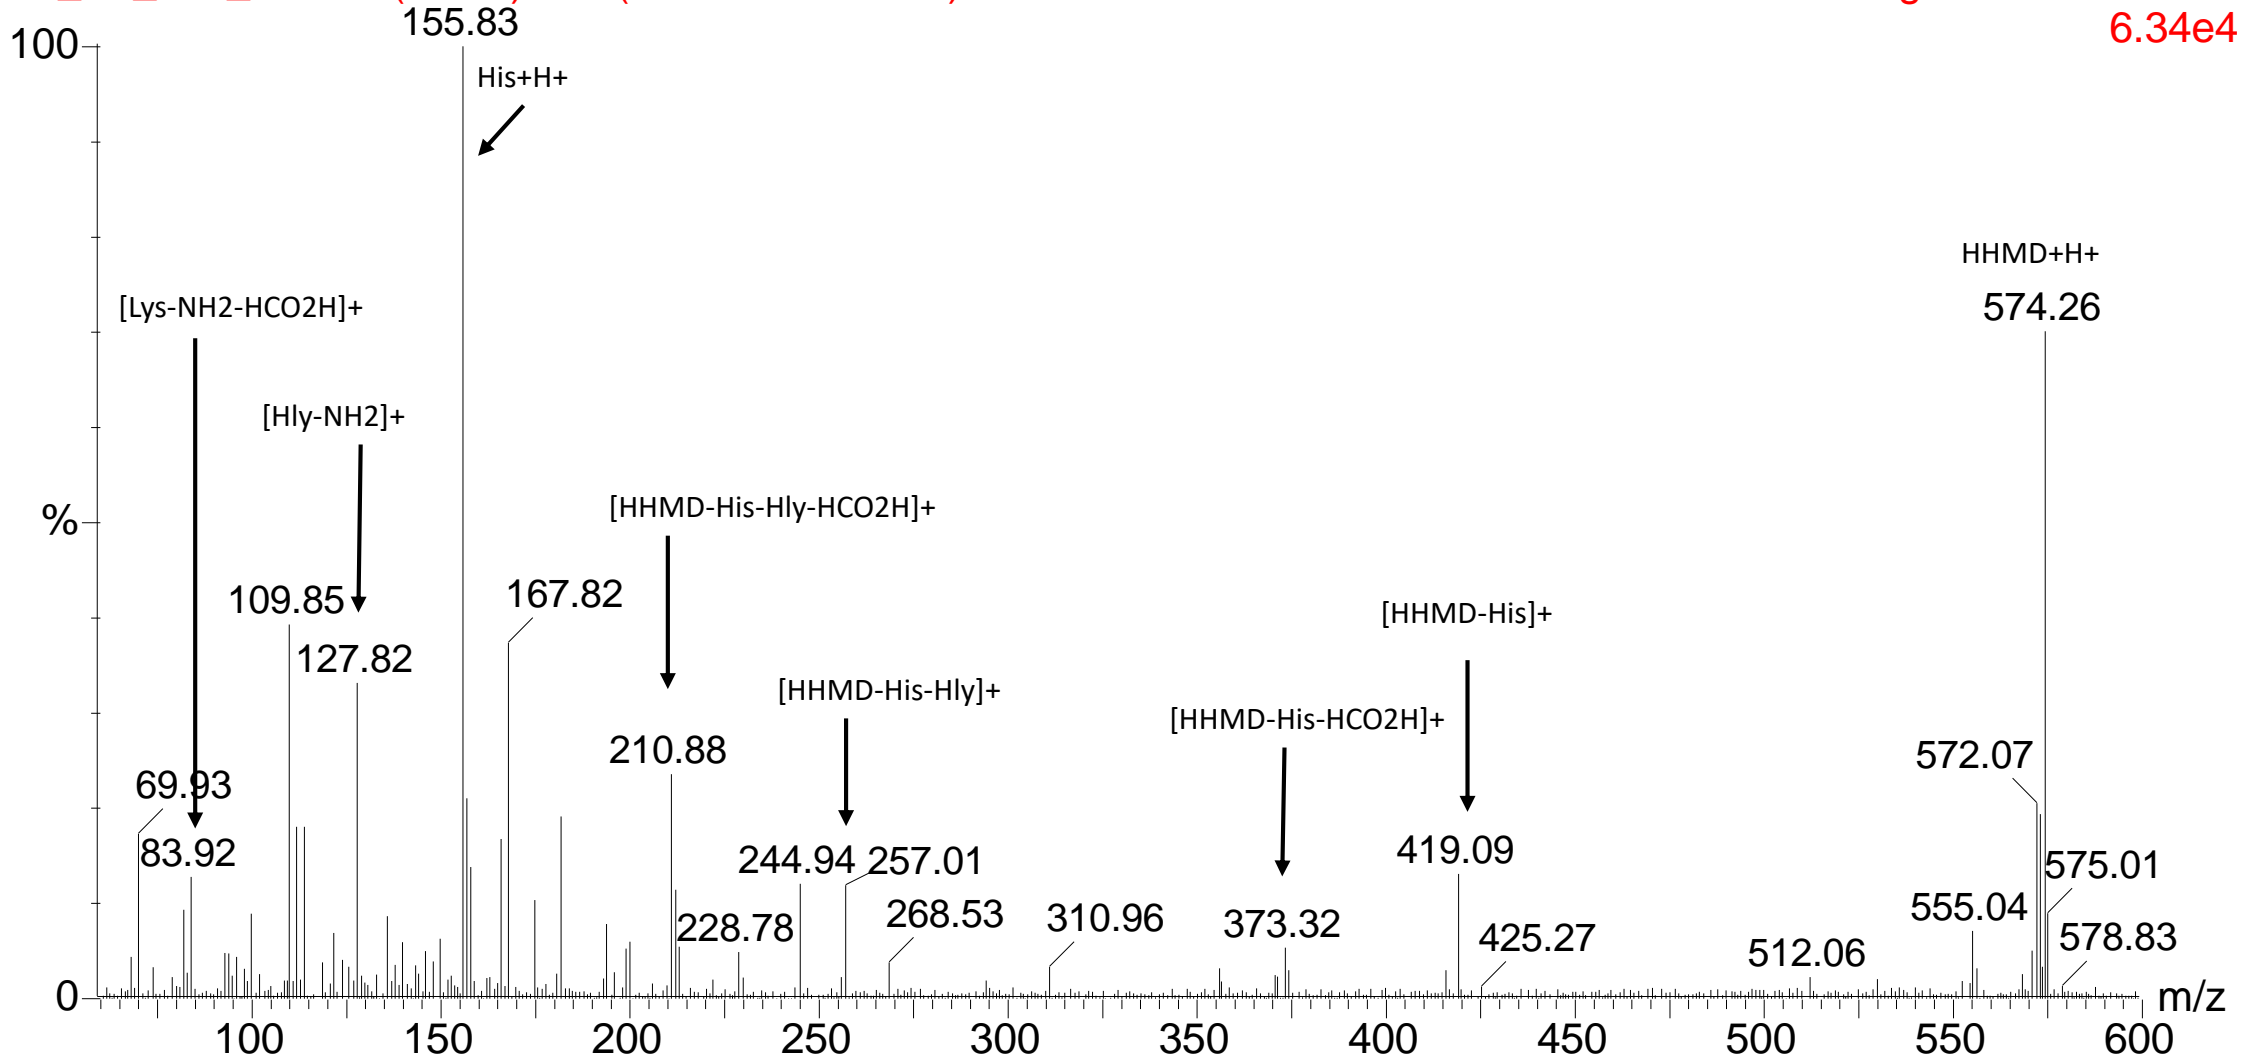

Figure S5 Reduction of HHMD with NaBH<sub>4</sub> and NaBD<sub>4</sub>

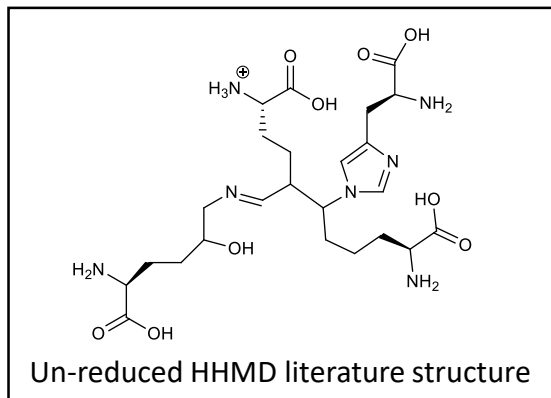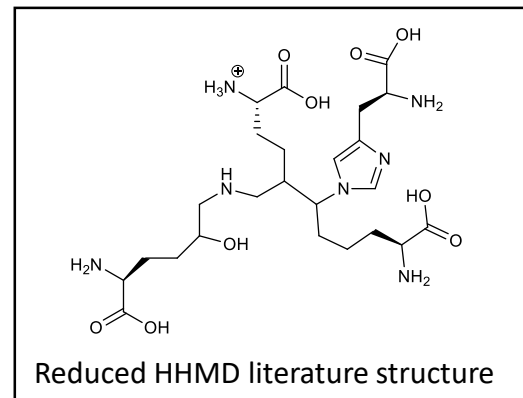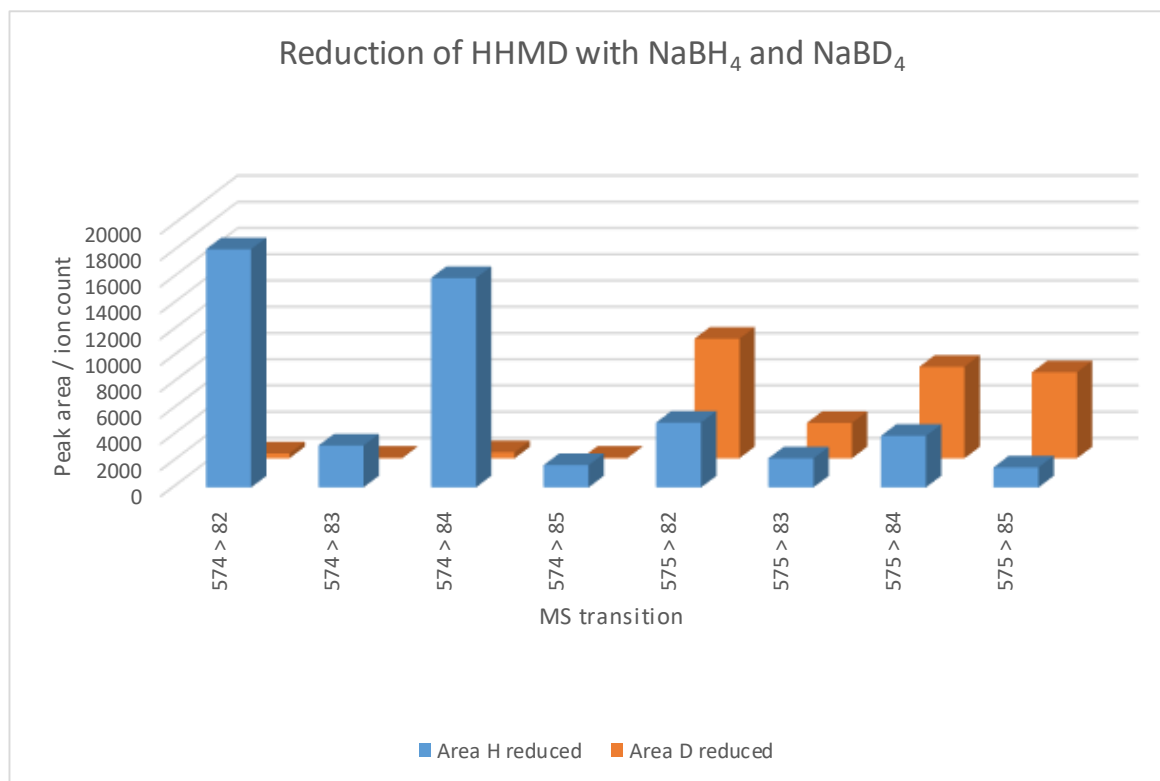

### Interpretation of ion transition

Blue 574 > 82 indicates presence of

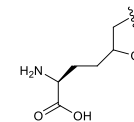

Blue 574 > 83 shows Lys fragment, protonated fragment or coincidental mass

Blue 574 > 84 indicates presence of

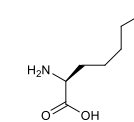

Blue 574 > 85 shows unidentified fragment or coincidental mass

Blue 575 transitions show <sup>13</sup>C isotope natural abundance

Orange 575 > 82 indicates presence of

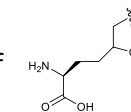

Orange 575 > 83 indicates presence of  
(Higher than the expected background signal)

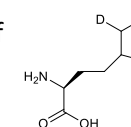

Orange 575 > 84 indicates presence of

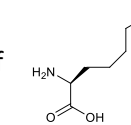

Orange 575 > 85 indicates presence of

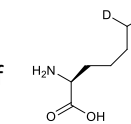

Figure S6

Fragmentation of NaBD<sub>4</sub> reduced HHMD signal

S4 D red HHMD Frag

MS\_JC\_093\_HHMD\_Dfrag\_05 621 (9.372) Cm (614:634-955:1012)

Daughters of 575ES+  
1.05e5

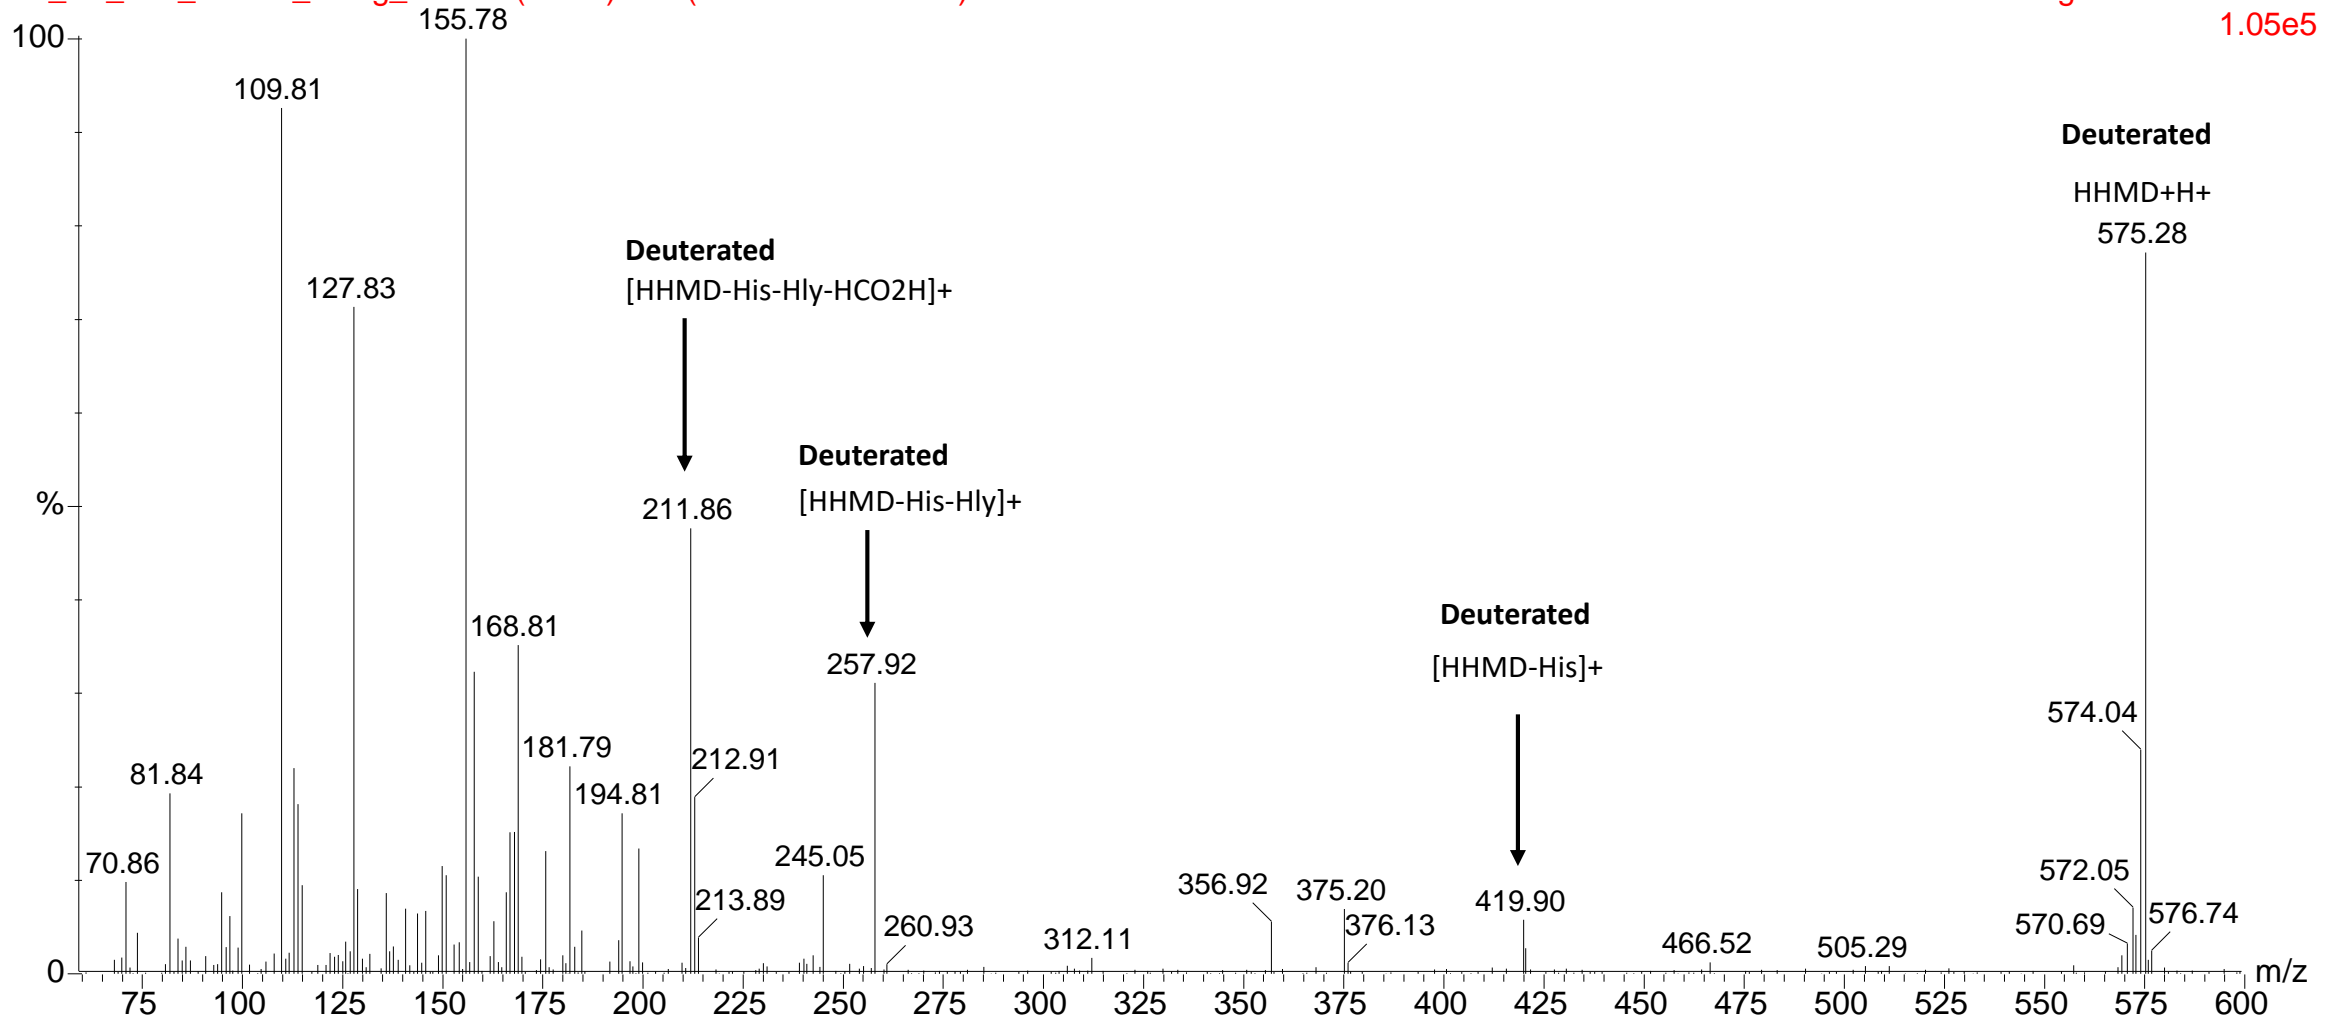

Figure S7a

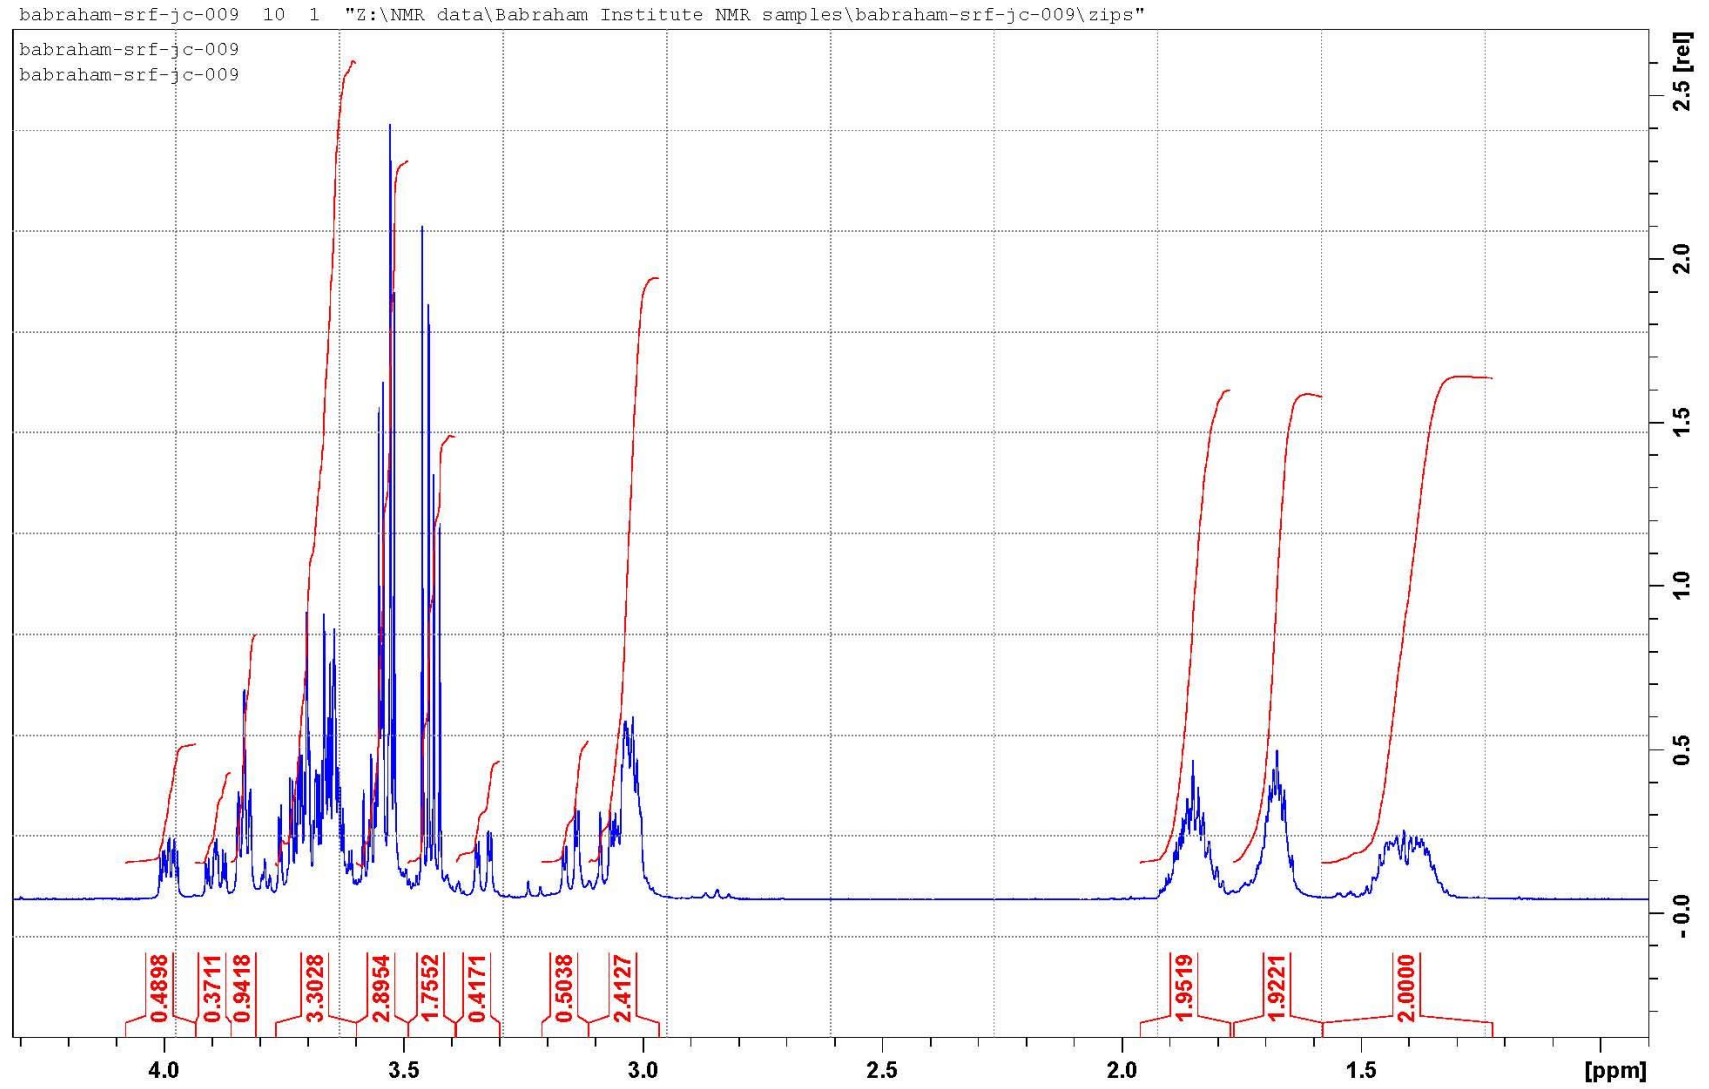

Proton NMR spectrum of Lys-Hx



Figure S7b

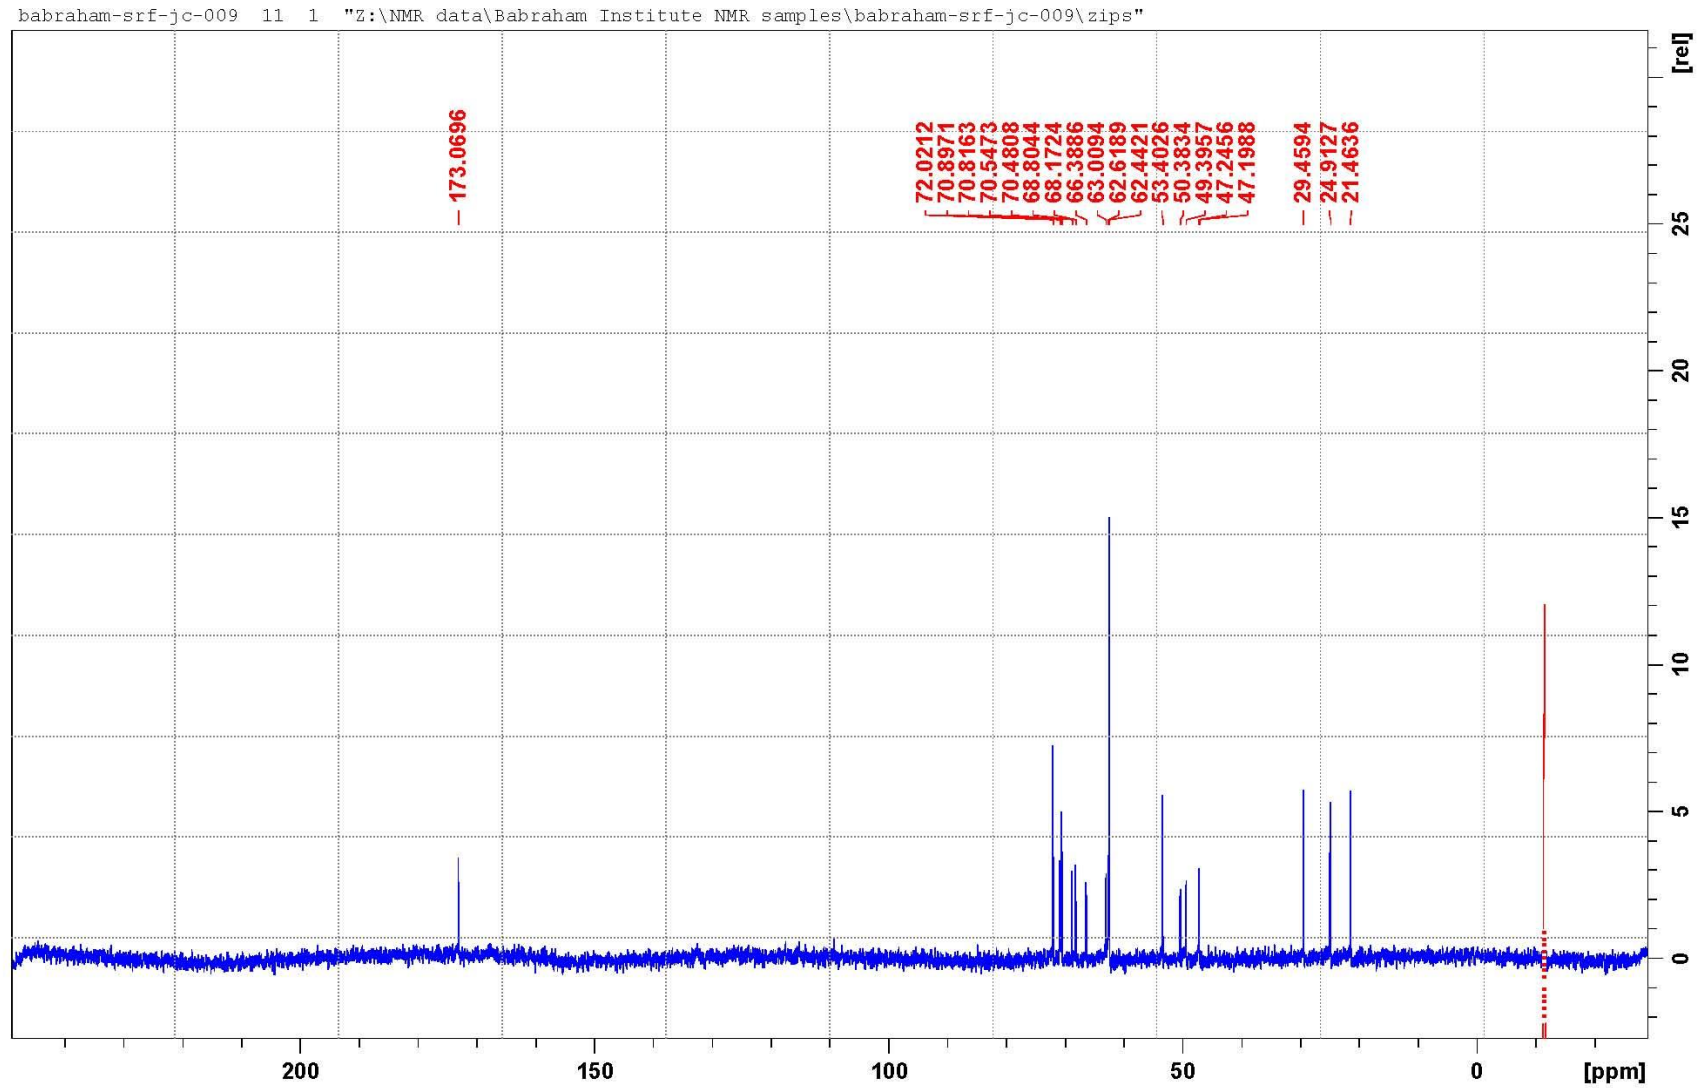

CPD carbon NMR spectrum of Lys-Hx

Figure S7c

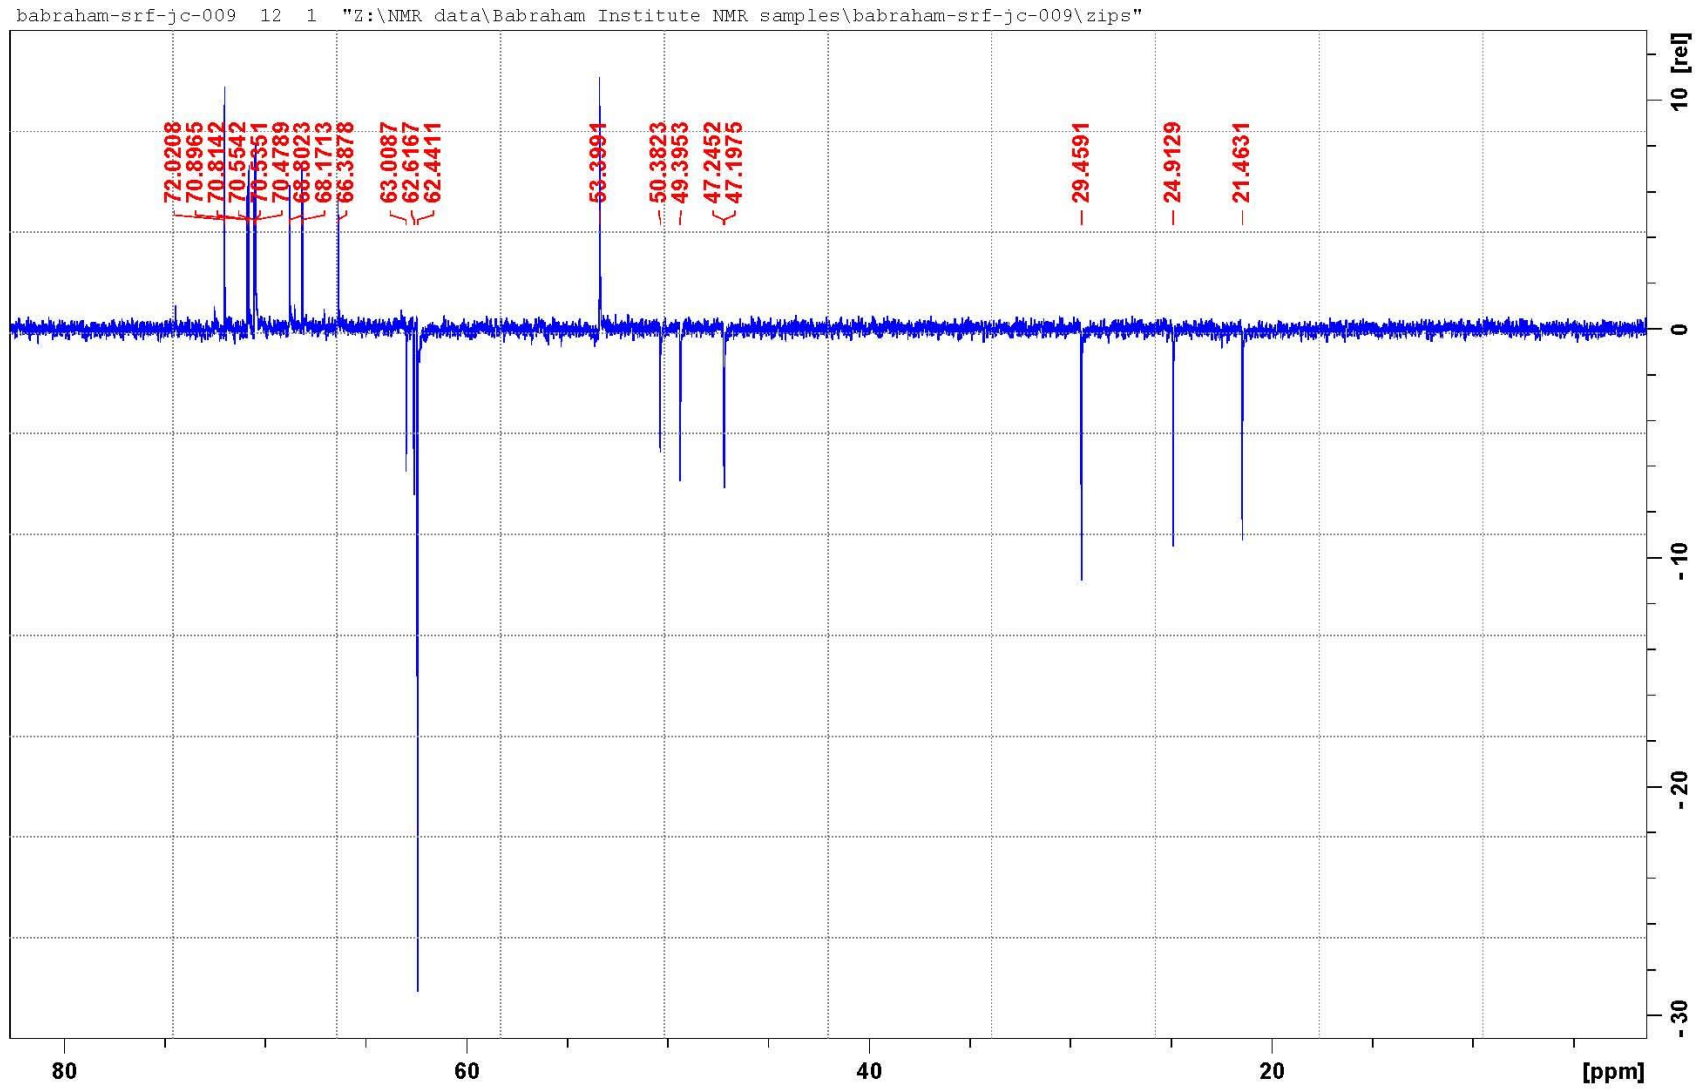

DEPT135 NMR spectrum of Lys-Hx

Figure S7d

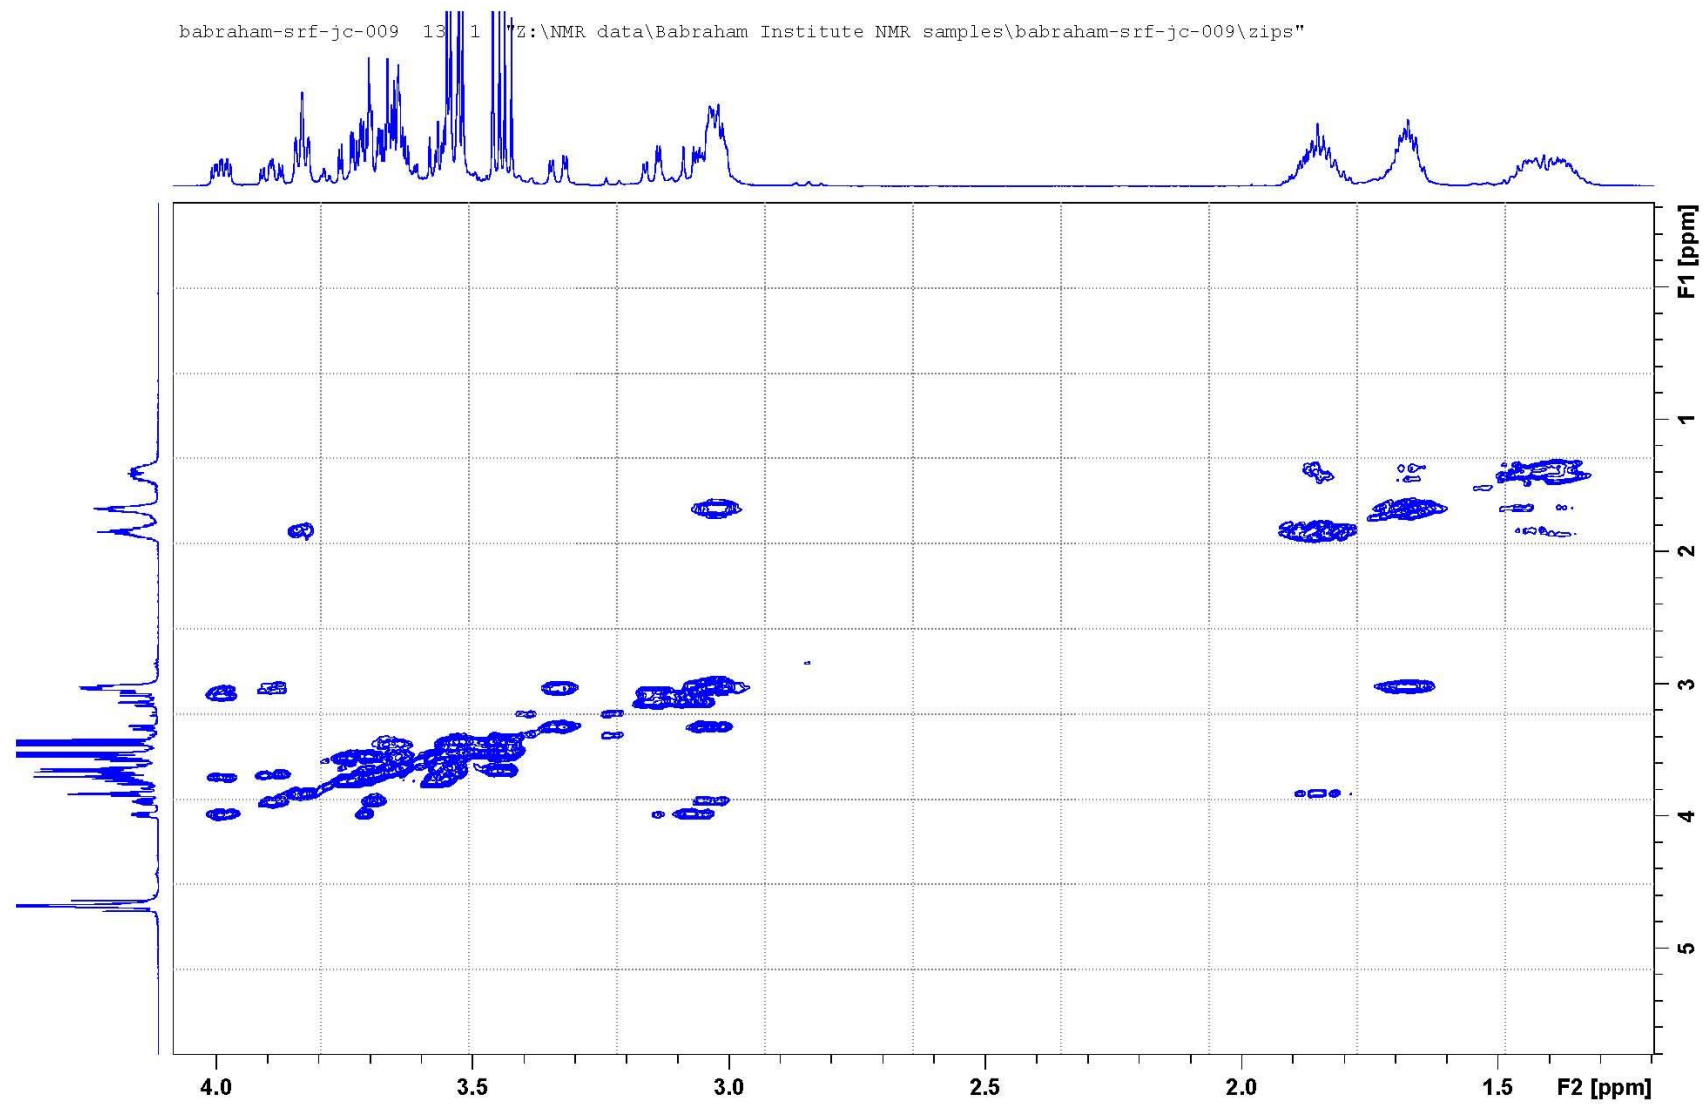

$^1\text{H}$  COSY NMR spectrum of Lys-Hx

Figure S7e

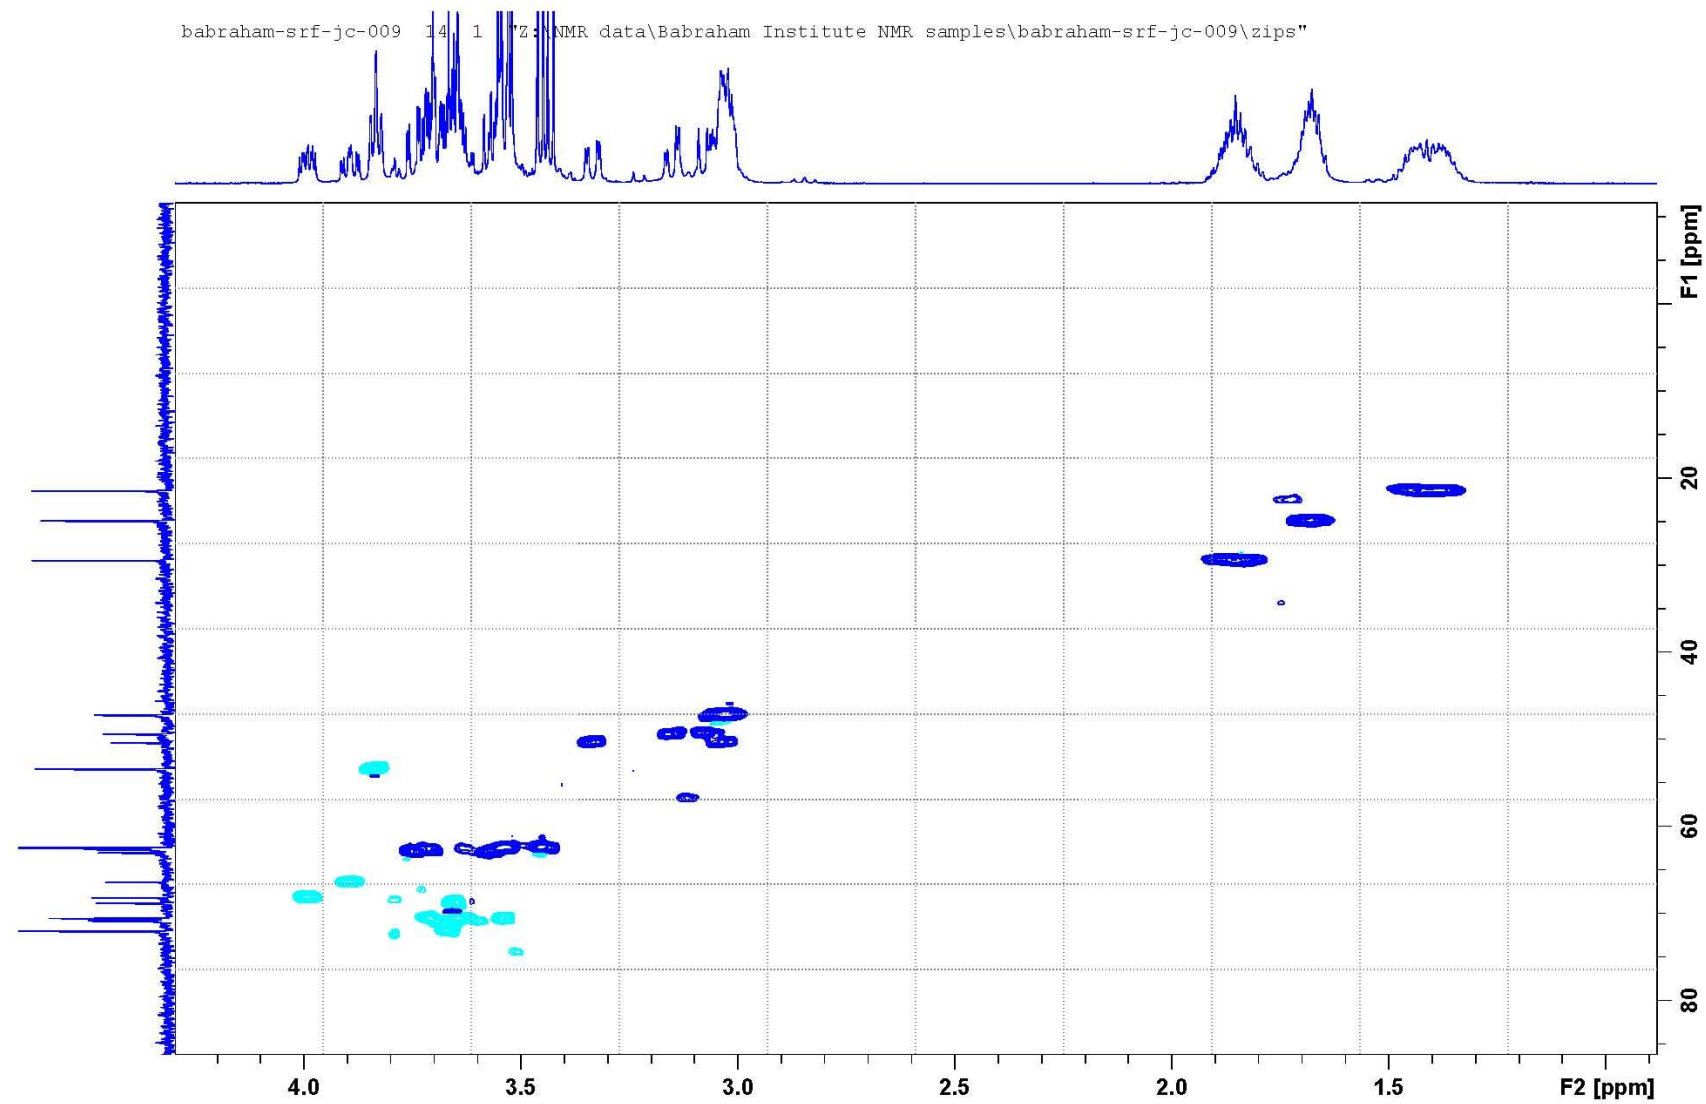

HSQC NMR spectrum of Lys-Hx

Figure S7f

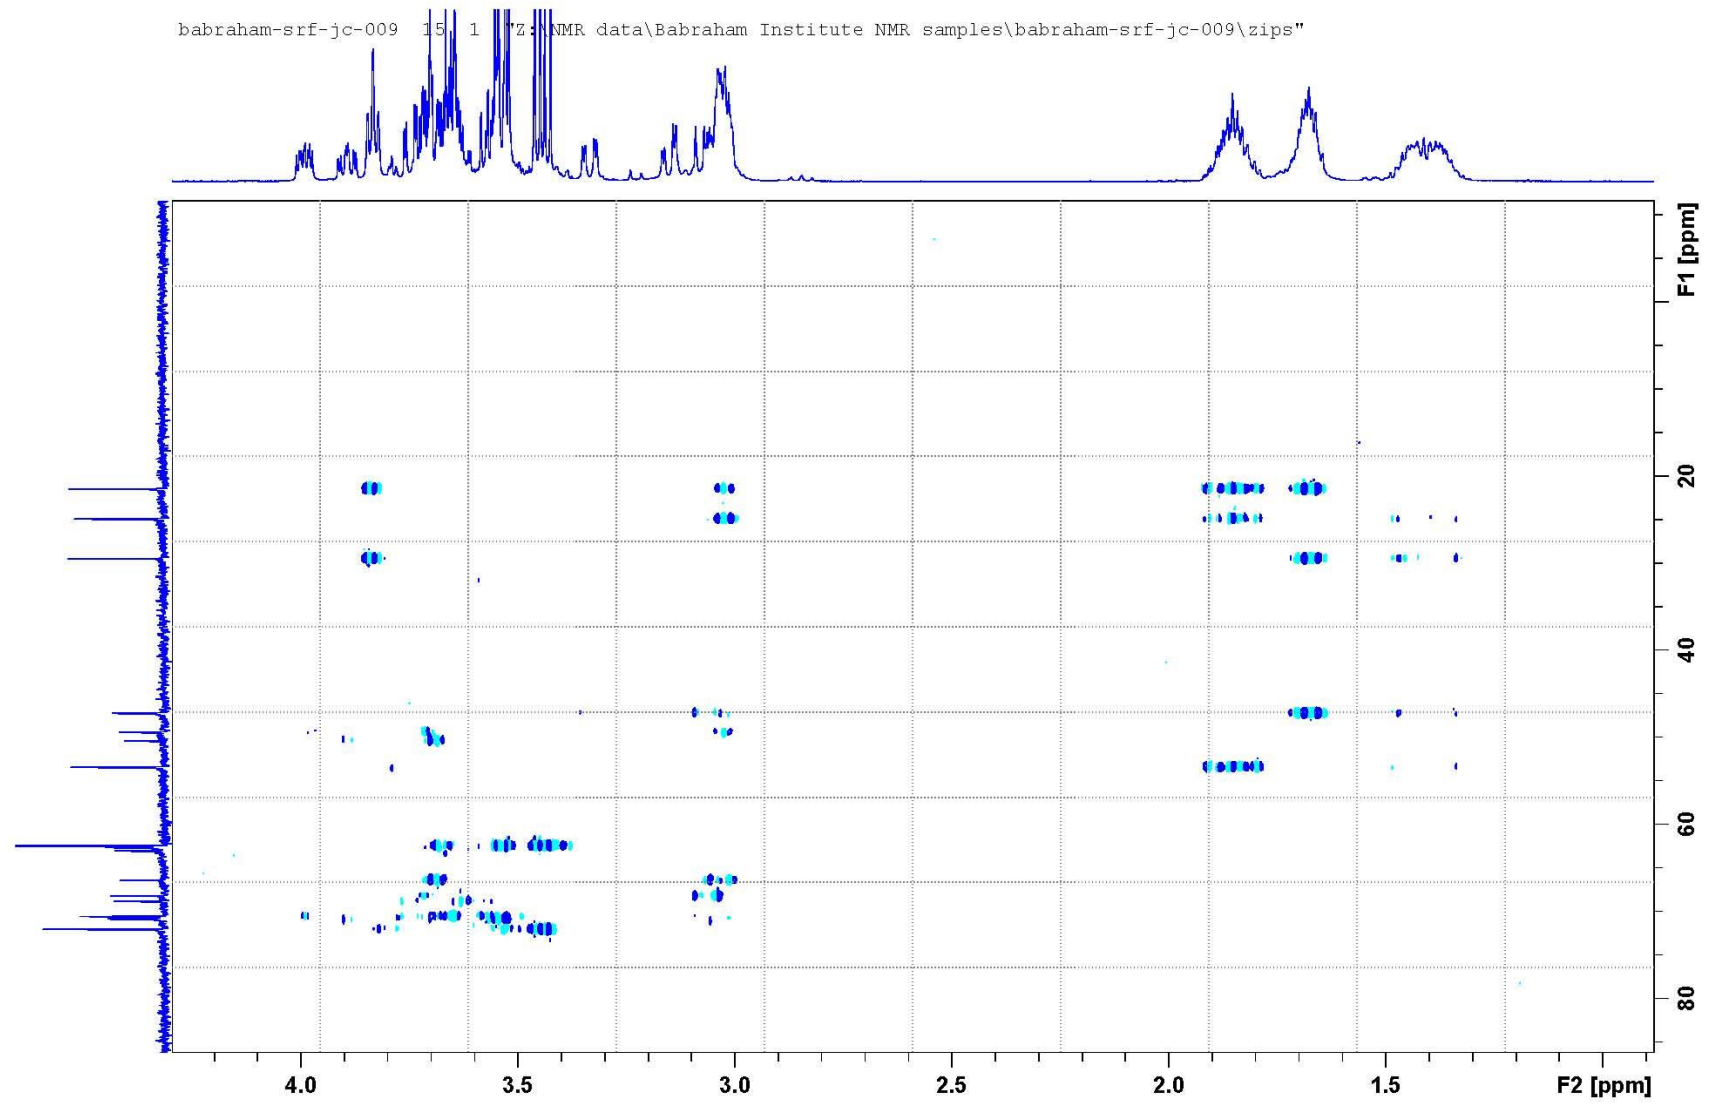

HMBC NMR spectrum of Lys-Hx

Figure S8

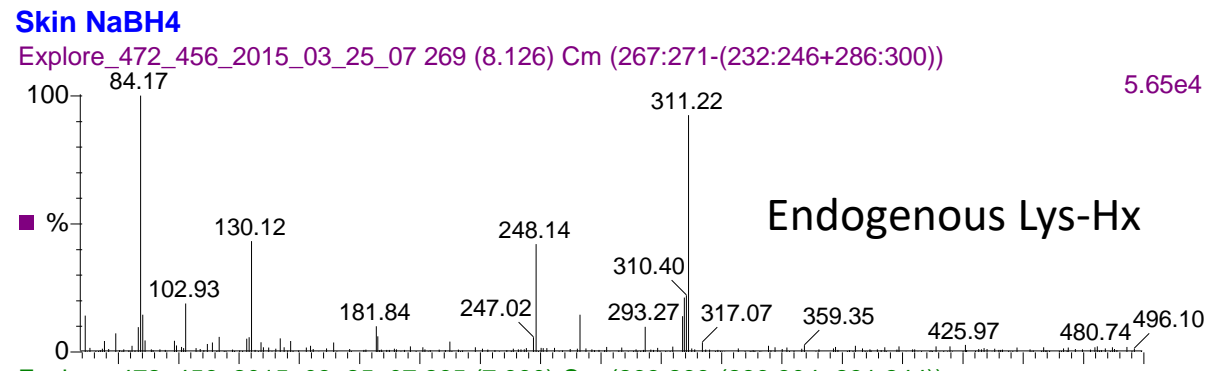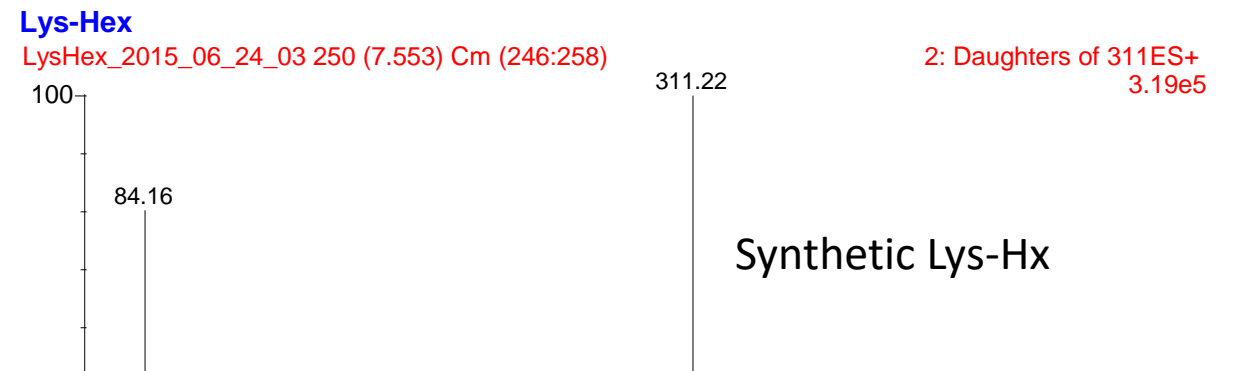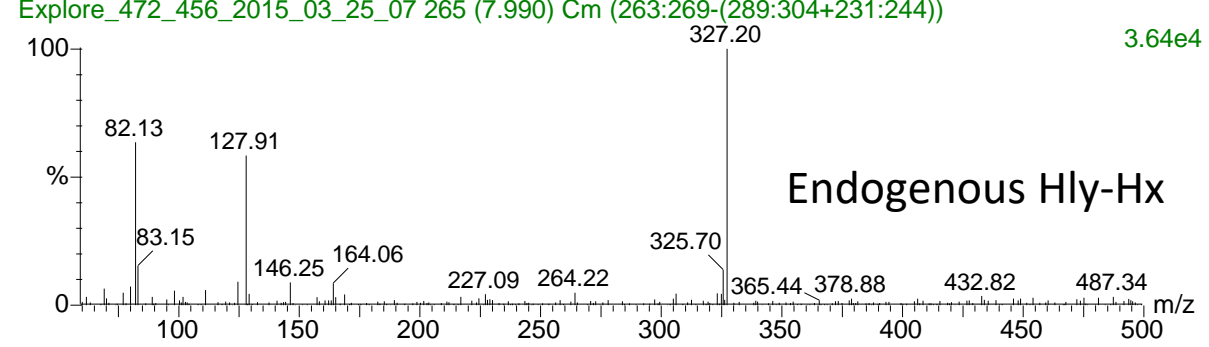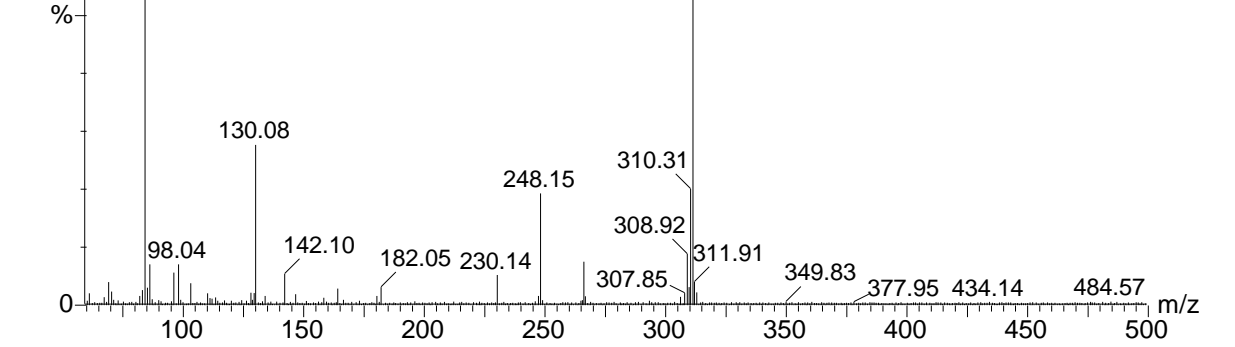

Fragmentation spectra of endogenous Lys-Hx from skin collagen and synthetic Lys-Hx

Figure S9

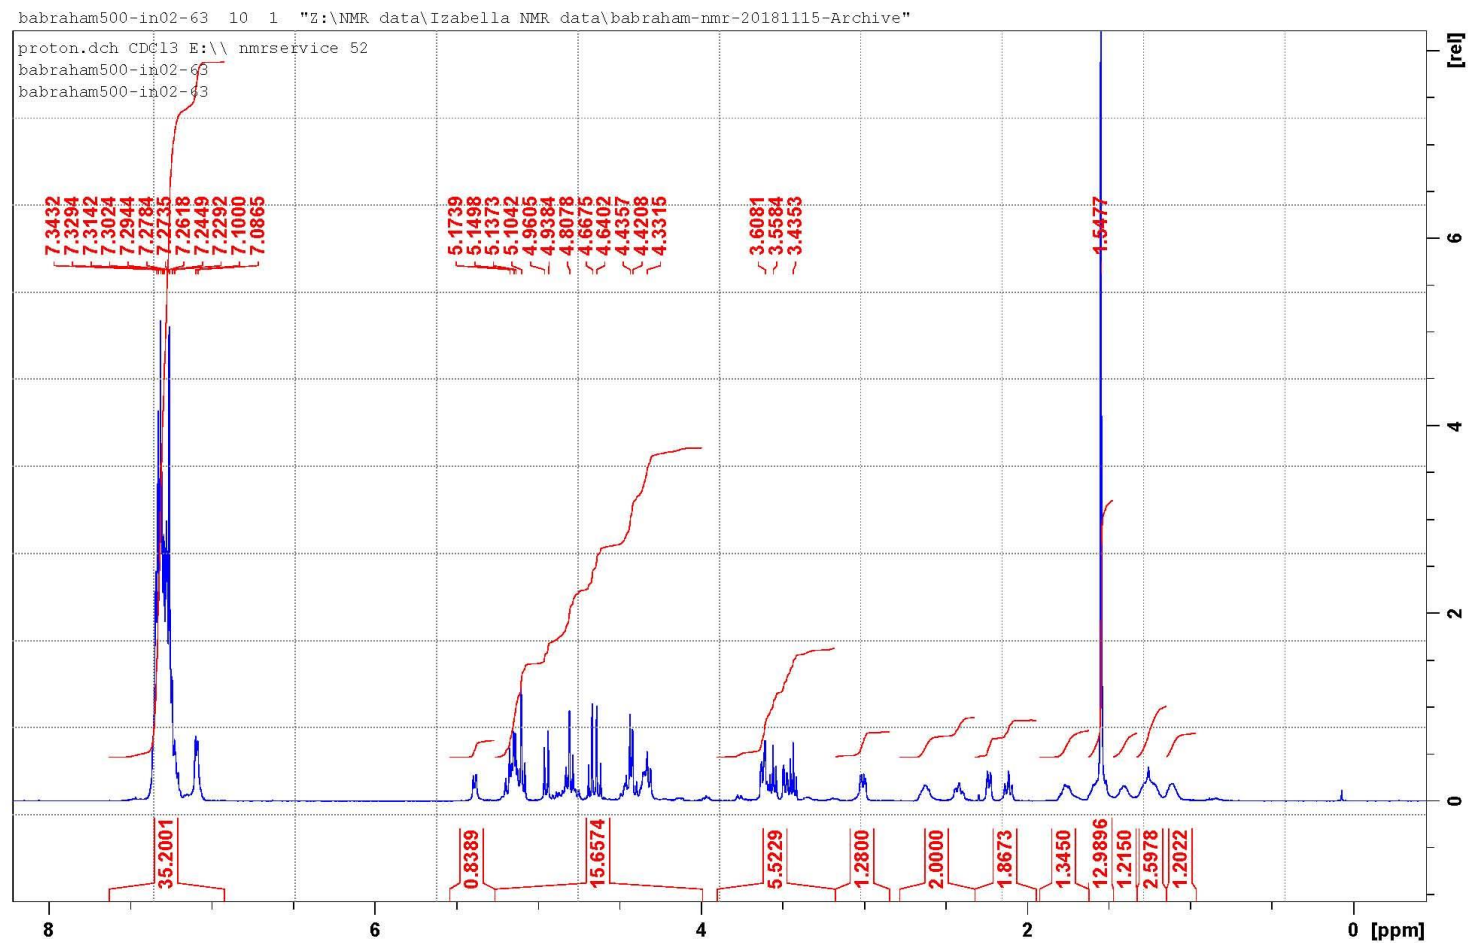

Proton NMR spectrum of benzyl-1-((benzyloxy)carbonyl)-5-(3,4,5-trihydroxy-2-(hydroxymethyl)piperidin-1-yl)pentyl carbamate



Figure S10a

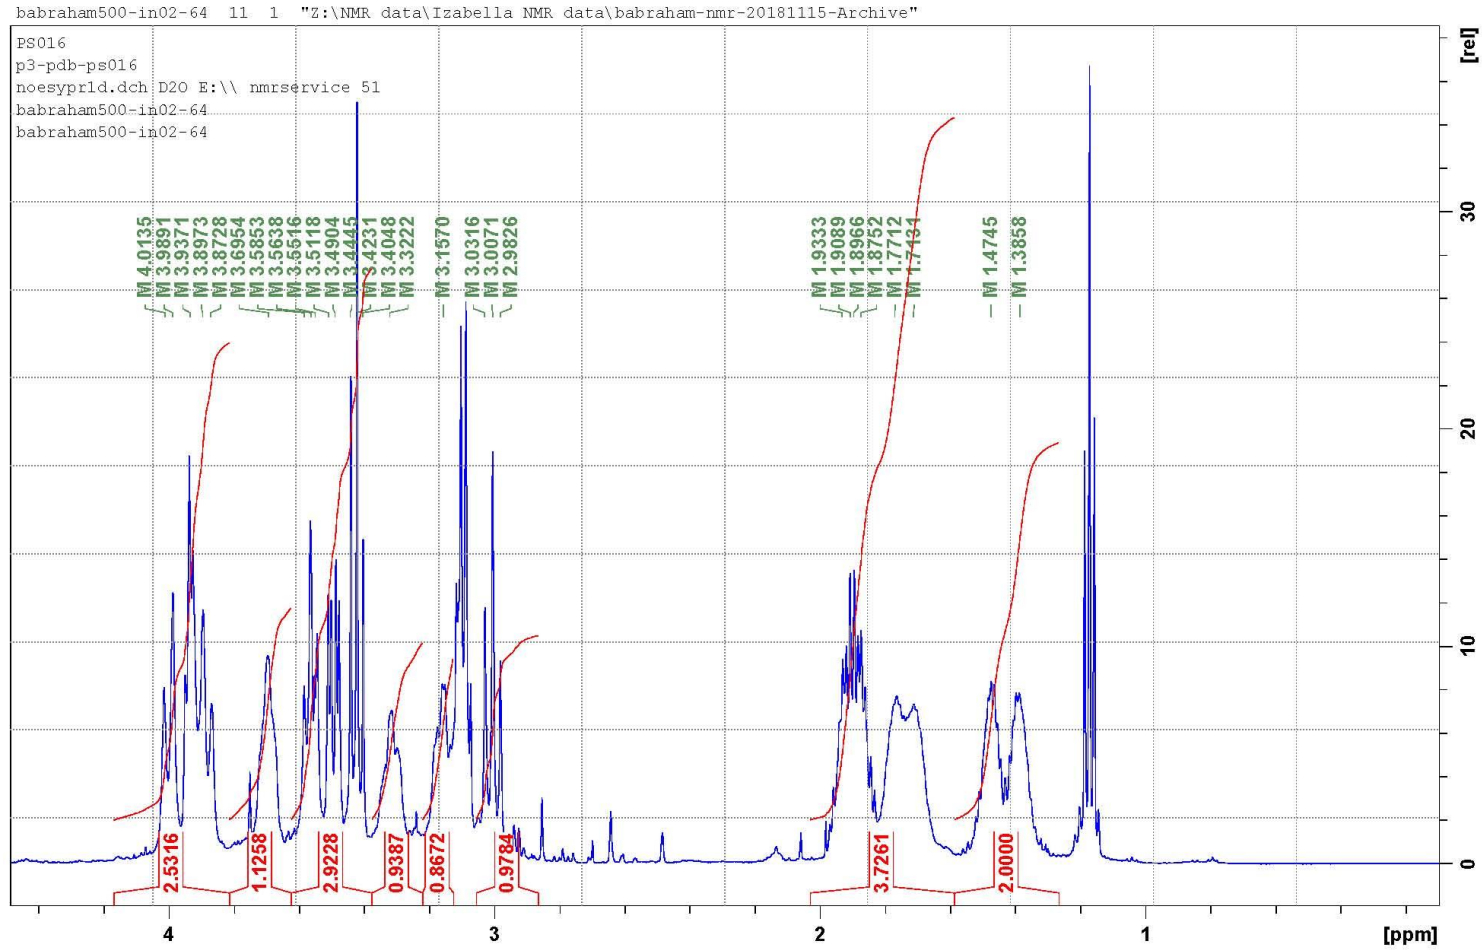

Proton NMR spectrum of 2-amino-6-(3,4,5-trihydroxy-2-(hydroxymethyl)piperidin-1-yl)hexanoic acid triethylamine salt (**Lys-cHx**)



Figure S10b

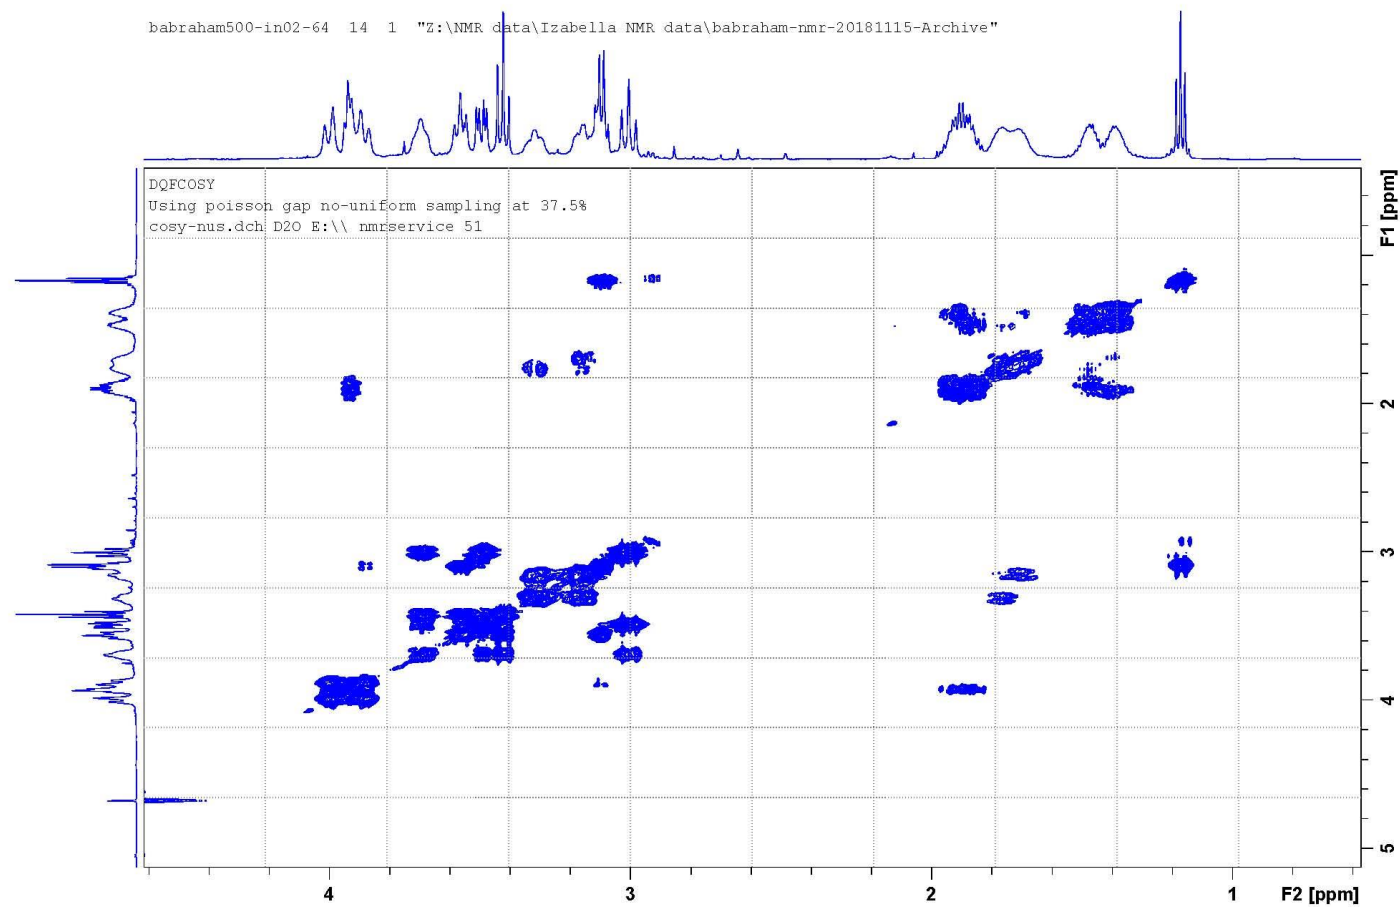

DQF COSY NMR spectrum of 2-amino-6-(3,4,5-trihydroxy-2-(hydroxymethyl)piperidin-1-yl)hexanoic acid triethylamine salt (**Lys-CHx**)

Figure S10c

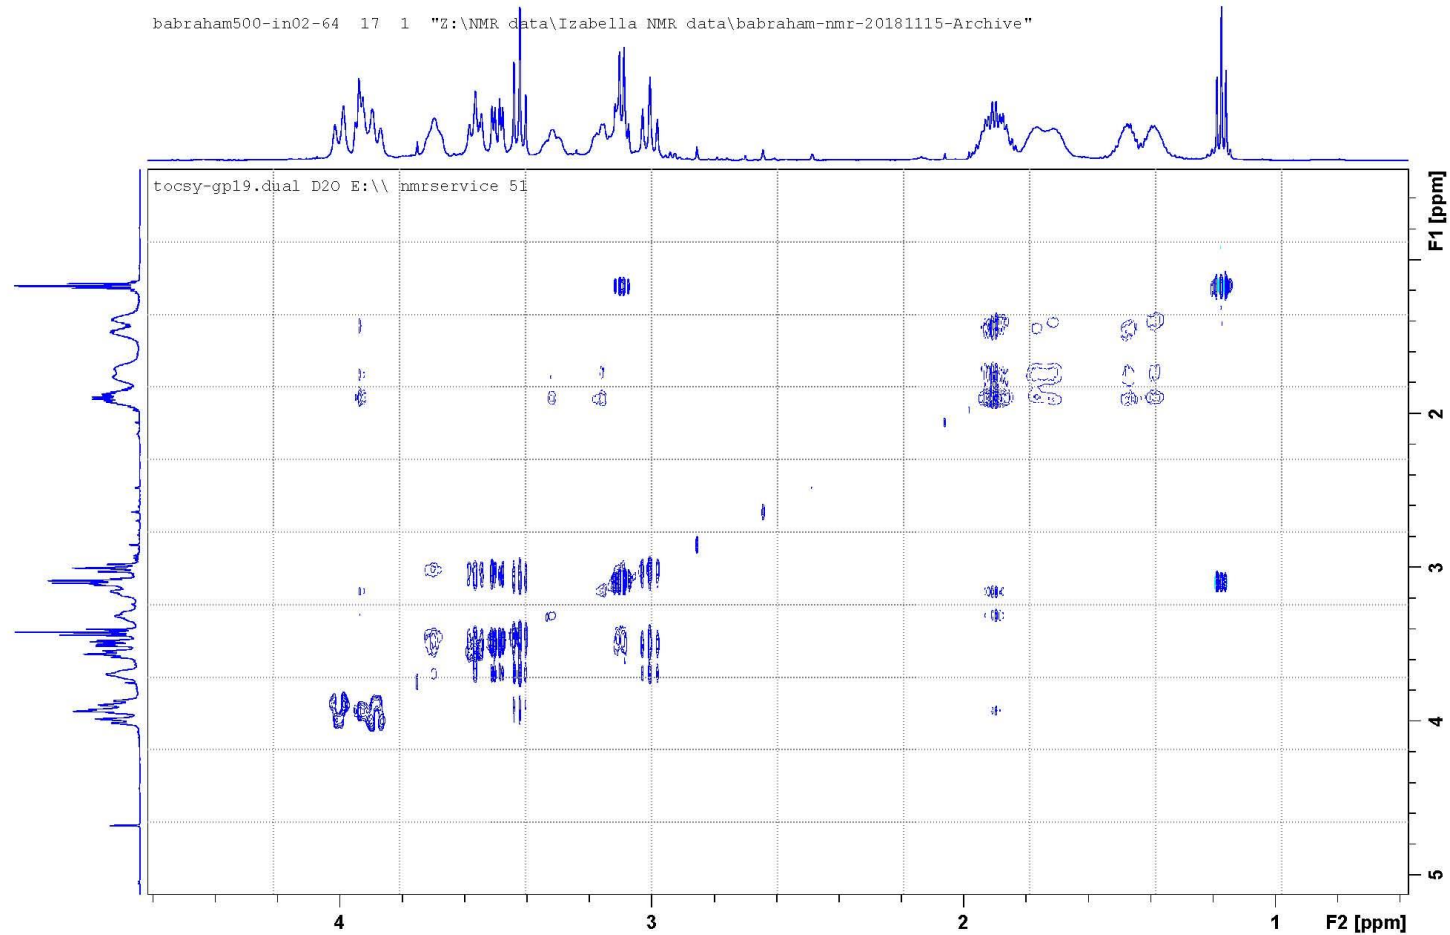

TOCSY NMR spectrum of 2-amino-6-(3,4,5-trihydroxy-2-(hydroxymethyl)piperidin-1-yl)hexanoic acid triethylamine salt (**Lys-cHx**)

Figure S10d

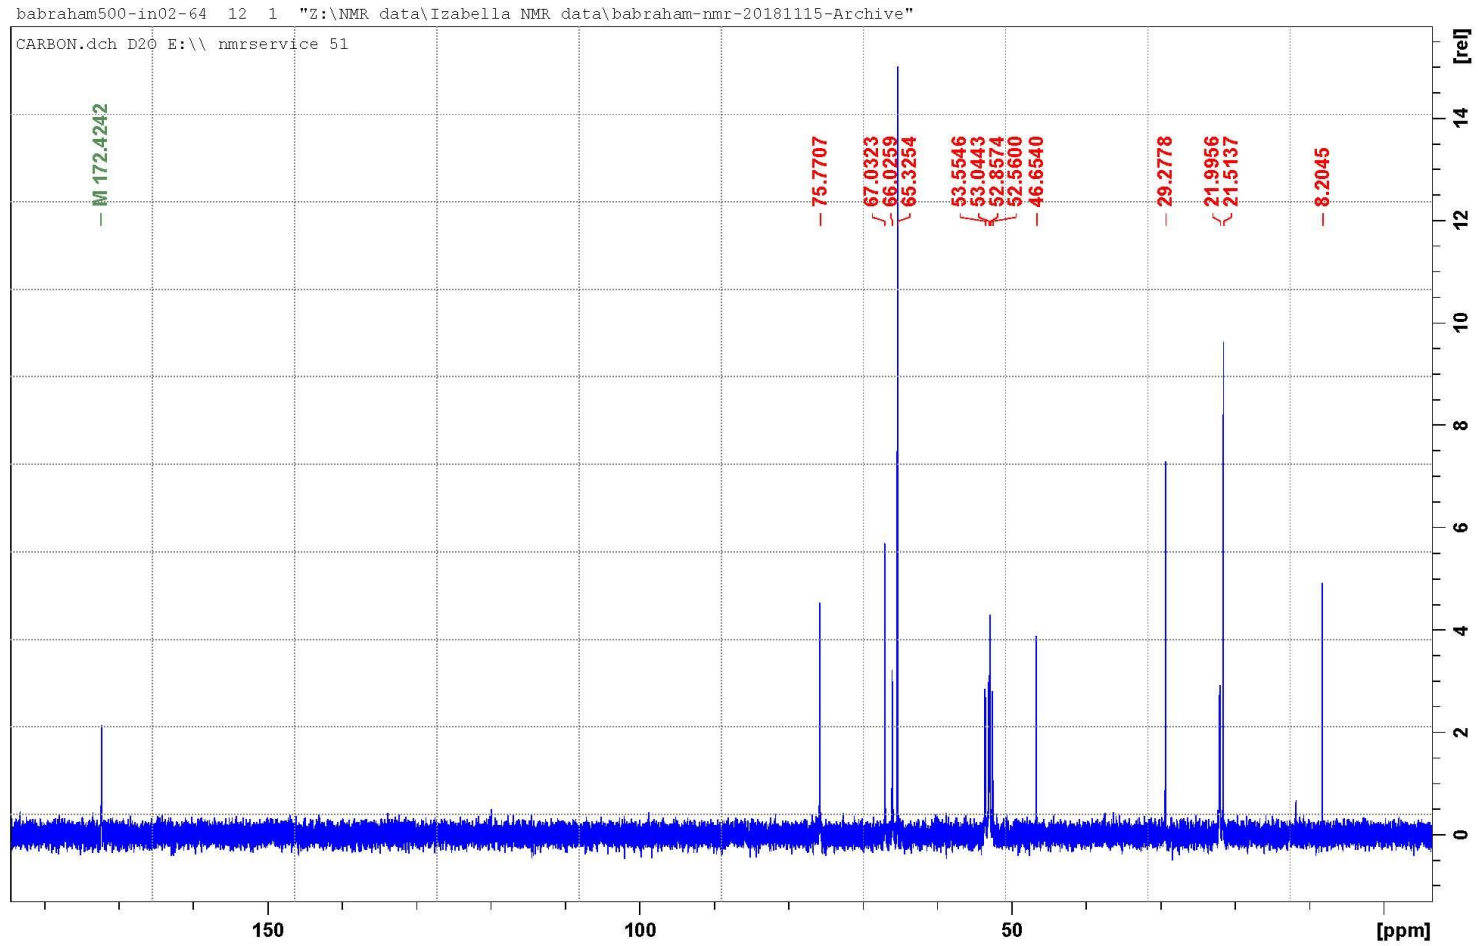

Carbon NMR spectrum of 2-amino-6-(3,4,5-trihydroxy-2-(hydroxymethyl)piperidin-1-yl)hexanoic acid triethylamine salt (**Lys-CHx**)

Figure S10e

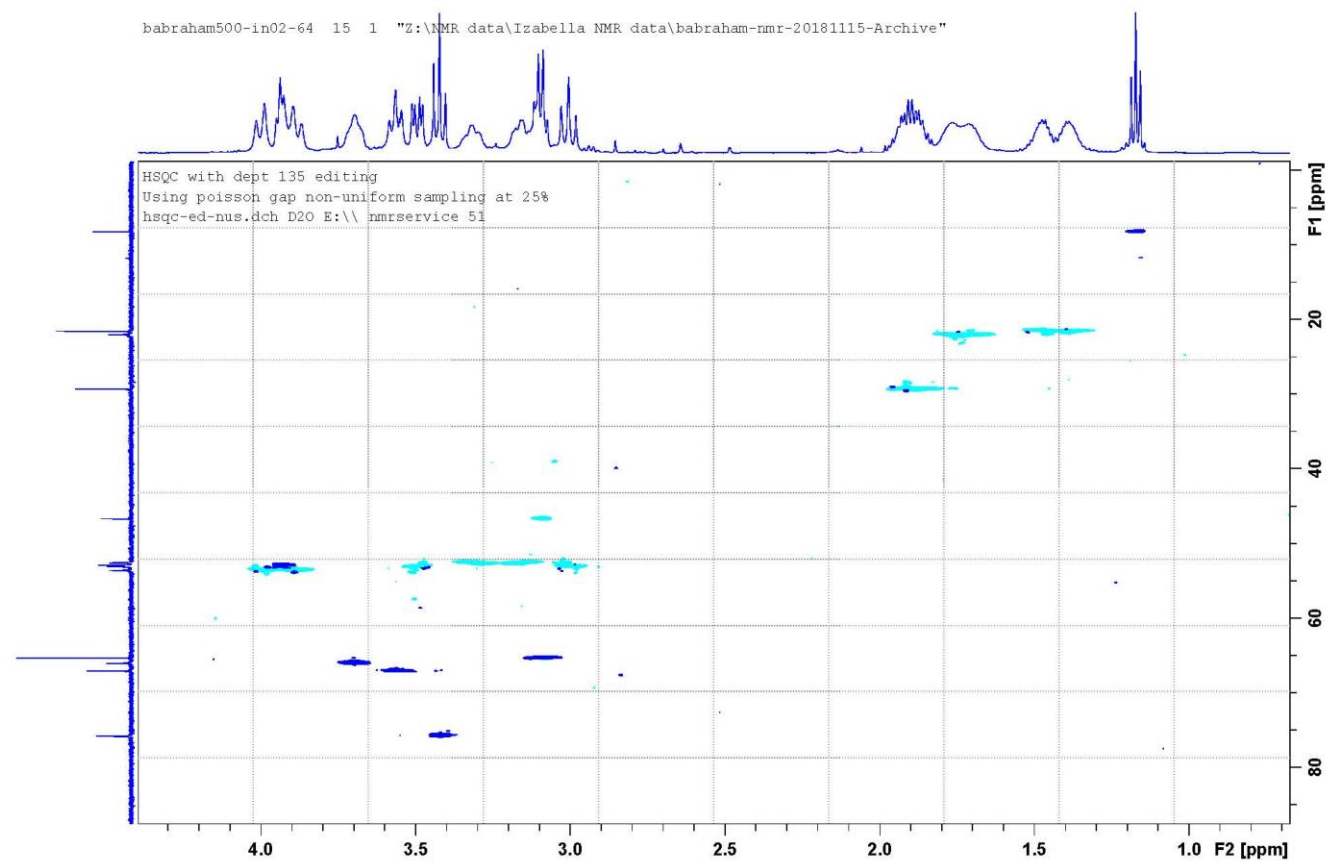

HSQC NMR spectrum of 2-amino-6-(3,4,5-trihydroxy-2-(hydroxymethyl)piperidin-1-yl)hexanoic acid triethylamine salt (**Lys-cHx**)
